# Supplementary material
Source: bioRxiv or medRxiv preprint supplement (https://www.biorxiv.org/highwire/filestream/69173/field_highwire_adjunct_files/0/226860-1.pdf)
Supplement: Supplementary file [file 226860-1.pdf]

## Niche separation increases with genetic distance among bloom-forming cyanobacteria

### Authors

Nicolas Tromas<sup>1\*#</sup>, Zofia E. Taranu<sup>2\*</sup>, Bryan D Martin<sup>3</sup>, Amy Willis<sup>4</sup>, Nathalie Fortin<sup>5</sup>, Charles W. Greer<sup>5</sup> and B. Jesse Shapiro<sup>1#</sup>

### SUPPLEMENTARY FIGURES AND TABLES

**Table S1.** Significant relationships between MED nodes and environmental variables

| Predictor     | Node # | R2-adj | p-value | Degree     | Genera  |
|---------------|--------|--------|---------|------------|---------|
| <b>PP</b>     | D2282  | 0.13   | 0.0008  | linear     | Dolicho |
|               | D5630  | 0.12   | 0.0013  | linear     | Dolicho |
|               | M5733  | 0.05   | 0.0558  | non-linear | Micro   |
|               | M5736  | 0.06   | 0.0200  | linear     | Micro   |
| <b>PN</b>     | D2282  | 0.05   | 0.0322  | linear     | Dolicho |
|               | D5630  | 0.09   | 0.0046  | linear     | Dolicho |
|               | M5733  | 0.05   | 0.0303  | linear     | Micro   |
|               | M5736  | 0.06   | 0.0167  | linear     | Micro   |
| <b>DP</b>     | M5732  | 0.04   | 0.0429  | linear     | Micro   |
|               | M5734  | 0.04   | 0.0461  | linear     | Micro   |
|               | M5738  | 0.05   | 0.0280  | linear     | Micro   |
| <b>DN</b>     | D2424  | 0.16   | 0.0002  | linear     | Dolicho |
|               | D5630  | 0.05   | 0.0342  | linear     | Dolicho |
|               | M5732  | 0.06   | 0.0248  | linear     | Micro   |
|               | M5734  | 0.06   | 0.0184  | linear     | Micro   |
| <b>Precip</b> | D2282  | 0.10   | 0.0029  | linear     | Dolicho |
|               | D5630  | 0.10   | 0.0034  | linear     | Dolicho |
| <b>Temp</b>   | M5734  | 0.07   | 0.0124  | linear     | Micro   |
|               | M5738  | 0.09   | 0.0065  | linear     | Micro   |
| <b>MC</b>     | M5734  | 0.07   | 0.0271  | non-linear | Micro   |

**Table S2.** Significant relationships between genera and environmental variables

| Predictor | Node #  | R2-adj      | p-value | Degree     |
|-----------|---------|-------------|---------|------------|
| <b>PP</b> | Dolicho | <b>0.15</b> | 0.0005  | linear     |
| <b>PN</b> | Dolicho | <b>0.16</b> | 0.0009  | non-linear |
| <b>DP</b> | Micro   | <b>0.06</b> | 0.0137  | linear     |
| <b>DN</b> | Dolicho | <b>0.07</b> | 0.0241  | linear     |

**Table S3.** Significant (bold font) and non-significant (grey font) correlations between fitted values from LVMs corresponding to the correlation-network in Figure S9.

| Predictor | Node pair        | r            | gen dist     |
|-----------|------------------|--------------|--------------|
| <b>PP</b> | <b>2282-5630</b> | <b>-0.91</b> | <b>0.047</b> |
|           | 2424-5630        | -0.57        | 0.012        |
|           | 5505-2282        | -0.30        | 0.02         |
|           | 5631-2282        | -0.21        | 0.043        |
|           | 2424-5505        | 0.21         | 0.016        |
|           | 2424-5631        | 0.23         | 0.008        |
|           | 5505-5630        | 0.65         | 0.028        |
|           | <b>2424-2282</b> | <b>0.84</b>  | <b>0.036</b> |
|           | 5631-5505        | 0.80         | 0.024        |
|           | 5631-5630        | 0.60         | 0.004        |
| <b>PN</b> | <b>2282-5630</b> | <b>-0.90</b> | <b>0.047</b> |
|           | 2424-5505        | -0.19        | 0.016        |
|           | 2424-5630        | -0.49        | 0.012        |
|           | 5505-2282        | -0.70        | 0.02         |
|           | 5631-2282        | -0.40        | 0.043        |
|           | 2424-5631        | 0.07         | 0.008        |
|           | 5505-5630        | 0.88         | 0.028        |
|           | 2424-2282        | 0.71         | 0.036        |
|           | 5631-5505        | 0.73         | 0.024        |
|           | 5631-5630        | 0.70         | 0.004        |
| <b>DP</b> | 2282-5630        | -0.68        | 0.047        |
|           | 2424-5630        | -0.06        | 0.012        |
|           | 5505-5630        | -0.17        | 0.028        |
|           | 2424-2282        | -0.13        | 0.036        |
|           | 5505-2282        | 0.00         | 0.02         |
|           | 5631-5630        | -0.33        | 0.004        |
|           | 2424-5505        | 0.68         | 0.016        |

|               |                  |              |              |
|---------------|------------------|--------------|--------------|
|               | 2424-5631        | 0.64         | 0.008        |
|               | 5631-2282        | 0.17         | 0.043        |
|               | 5631-5505        | 0.47         | 0.024        |
| <b>DN</b>     | 2282-5630        | -0.43        | 0.047        |
|               | 2424-2282        | -0.37        | 0.036        |
|               | 5505-2282        | -0.62        | 0.02         |
|               | <b>2424-5505</b> | <b>0.83</b>  | <b>0.016</b> |
|               | <b>2424-5630</b> | <b>0.93</b>  | <b>0.012</b> |
|               | 2424-5631        | 0.70         | 0.008        |
|               | <b>5505-5630</b> | <b>0.85</b>  | <b>0.028</b> |
|               | 5631-2282        | 0.19         | 0.043        |
|               | 5631-5505        | 0.19         | 0.024        |
|               | 5631-5630        | 0.57         | 0.004        |
| <b>Precip</b> | <b>2282-5630</b> | <b>-0.85</b> | <b>0.047</b> |
|               | 2424-5631        | -0.62        | 0.008        |
|               | 2424-2282        | -0.44        | 0.036        |
|               | 5505-2282        | -0.87        | 0.02         |
|               | 5631-2282        | -0.20        | 0.043        |
|               | 5631-5630        | -0.20        | 0.004        |
|               | 2424-5505        | 0.38         | 0.016        |
|               | <b>2424-5630</b> | <b>0.81</b>  | <b>0.012</b> |
|               | 5505-5630        | 0.77         | 0.028        |
|               | 5631-5505        | 0.19         | 0.024        |
| <b>Temp</b>   | 2282-5630        | -0.33        | 0.047        |
|               | 2424-5631        | -0.04        | 0.008        |
|               | 2424-2282        | -0.34        | 0.036        |
|               | 5505-2282        | -0.15        | 0.02         |
|               | 5631-5505        | -0.09        | 0.024        |
|               | 5631-5630        | -0.12        | 0.004        |
|               | 2424-5505        | 0.56         | 0.016        |
|               | 2424-5630        | 0.74         | 0.012        |
|               | 5505-5630        | 0.41         | 0.028        |
|               | 5631-2282        | 0.02         | 0.043        |
| <b>MC</b>     | 2282-5630        | 0.00         | 0.047        |
|               | 2424-5630        | -0.01        | 0.012        |
|               | 5505-5630        | -0.16        | 0.028        |
|               | 2424-2282        | -0.35        | 0.036        |
|               | 5505-2282        | -0.23        | 0.02         |
|               | 5631-2282        | -0.11        | 0.043        |
|               | 5631-5630        | -0.50        | 0.004        |
|               | 2424-5505        | 0.79         | 0.016        |
|               | 2424-5631        | 0.45         | 0.008        |
|               | 5631-5505        | 0.51         | 0.024        |

**Table S4.** Significant ( $p < 0.10$ ) relationships between LVM co-responses and genetic distance as shown in Figures 4 and S8.

| Predictor | R2-adj | p-value | Degree | Genera  |
|-----------|--------|---------|--------|---------|
| PP        | 0.69   | 0.0184  | cubic  | Dolicho |
| PN        | 0.63   | 0.0280  | cubic  | Dolicho |
| DN        | 0.25   | 0.0791  | linear | Dolicho |
| MC        | 0.29   | 0.0231  | linear | Micro   |

**Table S5.** Table of the taxa present in both *D* and *M* networks (Figure S9). In bold are represented taxa that are co-occurrent with both *D* and *M*.

| Nodes       | Taxonomy                                                                                                                 |
|-------------|--------------------------------------------------------------------------------------------------------------------------|
| 2966        | p_Bacteroidetes  c_[Saprospirae]  o_[Saprospirales]  bacI  bacI-A  unclassified                                          |
| 3667        | p_Bacteroidetes  c_Cytophagia  o_Cytophagales  f_Cytophagaceae  unclassified  unclassified                               |
| 5983        | p_Bacteroidetes  c_Cytophagia  o_Cytophagales  f_Cytophagaceae  unclassified  unclassified                               |
| 5984        | p_Bacteroidetes  c_Cytophagia  o_Cytophagales  f_Cytophagaceae  unclassified  unclassified                               |
| 6317        | p_Bacteroidetes  c_Flavobacteriia  o_Flavobacteriales  bacII  bacII-A  unclassified                                      |
| 6331        | p_Bacteroidetes  c_Sphingobacteriia  o_Sphingobacteriales  unclassified  unclassified                                    |
| 4062        | p_Chloroflexi  c_SL56  unclassified  unclassified  unclassified  unclassified                                            |
| <b>1059</b> | <b>p_Cyanobacteria  c_Synechococcophycidae  o_Pseudanabaenales  f_Pseudanabaenaceae  g_Pseudanabaena  unclassified</b>   |
| <b>1061</b> | <b>p_Cyanobacteria  c_Synechococcophycidae  o_Pseudanabaenales  f_Pseudanabaenaceae  g_Pseudanabaena  unclassified</b>   |
| 2392        | p_Gemmatimonadetes  c_Gemmatimonadetes  o_Gemmatimonadales  unclassified  unclassified  unclassified                     |
| <b>4674</b> | <b>p_Proteobacteria  c_Alphaproteobacteria  o_Caulobacteriales  f_Caulobacteraceae  g_Phenylobacterium  unclassified</b> |
| 4737        | p_Proteobacteria  c_Alphaproteobacteria  o_Rhizobiales  alfI  alfI-A  alfI-A1                                            |
| 3705        | p_Proteobacteria  c_Alphaproteobacteria  o_Rhizobiales  f_Xanthobacteraceae  unclassified  unclassified                  |
| 3726        | p_Proteobacteria  c_Alphaproteobacteria  o_Rhizobiales  unclassified  unclassified                                       |
| 5294        | p_Proteobacteria  c_Alphaproteobacteria  o_Rhodospirillales  alfVIII  unclassified  unclassified                         |

|             |                                                                                                         |
|-------------|---------------------------------------------------------------------------------------------------------|
| 5471        | p_Proteobacteria  c_Alphaproteobacteria  o_Rhodospirillales  alfVIII  unclassified  unclassified        |
| <b>7272</b> | <b>p_Proteobacteria  c_Alphaproteobacteria  o_Rhodospirillales  alfVIII  unclassified  unclassified</b> |
| 7273        | p_Proteobacteria  c_Alphaproteobacteria  o_Rhodospirillales  alfVIII  unclassified  unclassified        |
| 7655        | p_Proteobacteria  c_Betaproteobacteria  o_Burkholderiales  betVII  unclassified  unclassified           |
| 5221        | p_Proteobacteria  c_Betaproteobacteria  o_Burkholderiales  f_Comamonadaceae  g_Rubrivivax  unclassified |
| 4374        | p_Proteobacteria  c_Betaproteobacteria  o_Burkholderiales  f_Comamonadaceae  unclassified  unclassified |
| <b>4756</b> | <b>p_Proteobacteria  c_Betaproteobacteria  o_undefined  betV  betV-A  betV-A1</b>                       |
| 4757        | p_Proteobacteria  c_Betaproteobacteria  o_undefined  betV  betV-A  betV-A1                              |
| 4377        | p_Proteobacteria  c_Betaproteobacteria  unclassified  unclassified  unclassified  unclassified          |
| 6996        | p_Proteobacteria  c_Betaproteobacteria  unclassified  unclassified  unclassified  unclassified          |
| 1286        | p_Verrucomicrobia  c_[Spartobacteria]  o_[Chthoniobacterales]  verI-A  Xip-A1  unclassified             |

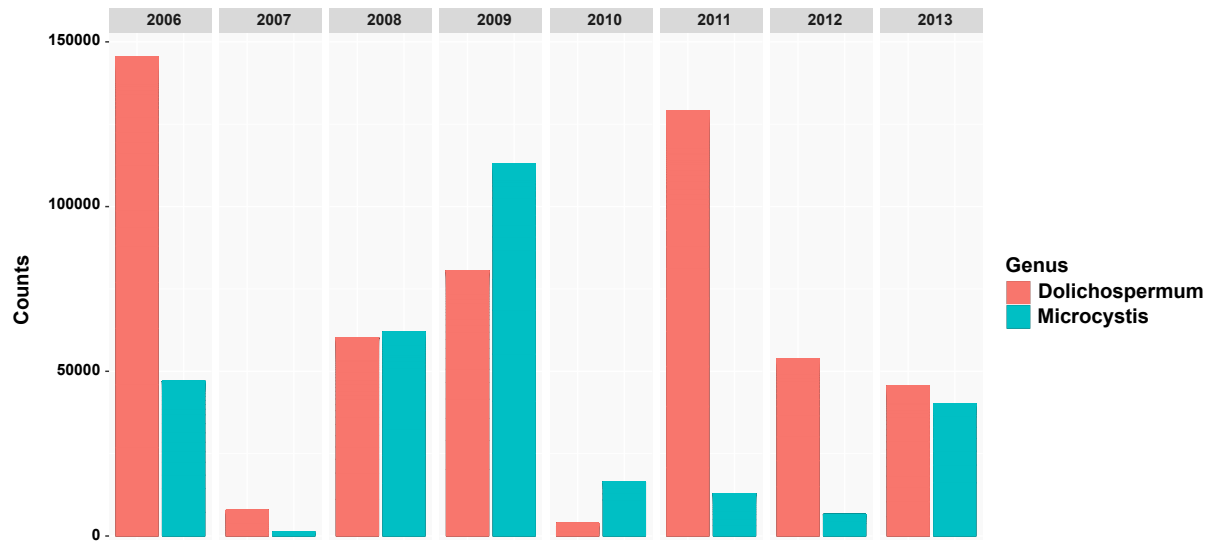

Figure S1

**Figure S1.** Barplot of the absolute abundance (counts of sequence reads) of *Dolichospermum* and *Microcystis* genera in Lake Champlain's Bay Missisquoi from 2006 to 2013.

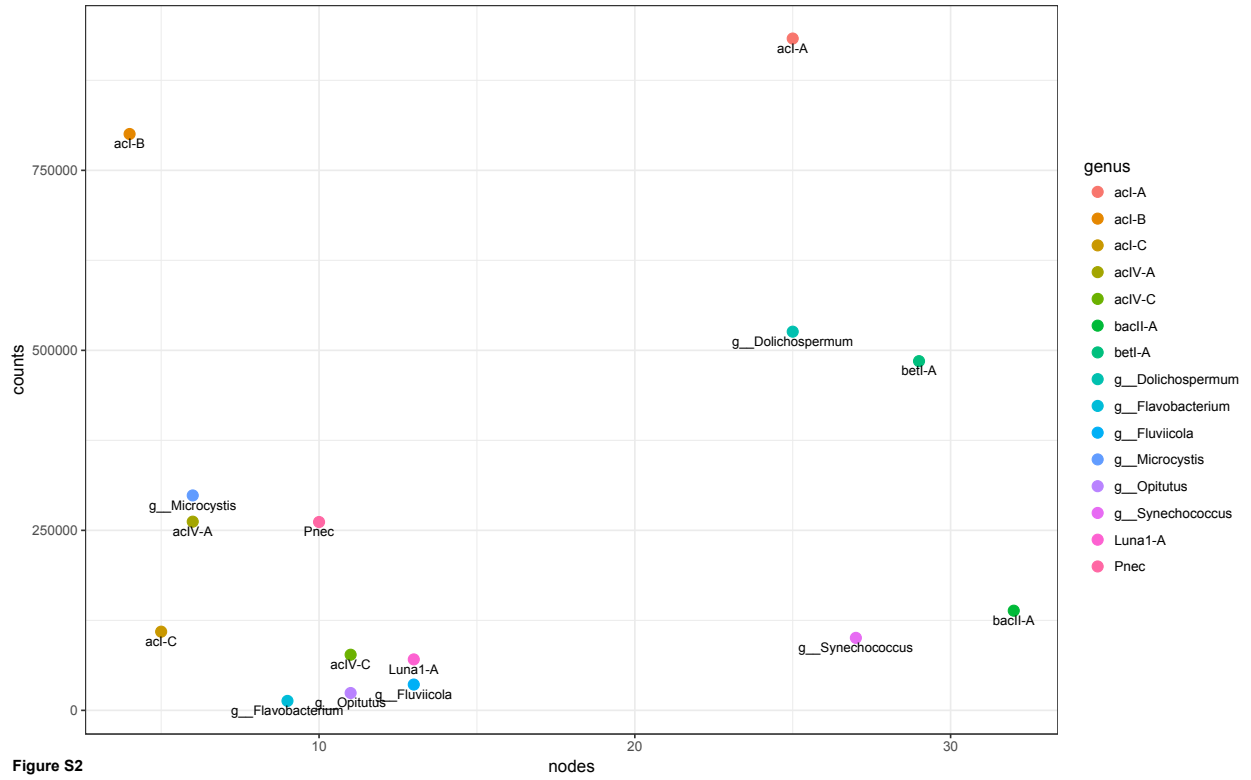

**Figure S2.** Scatterplot plot illustrating the lack of significant correlation between counts (number of sequence reads per genus) and the number of MED nodes per genus.

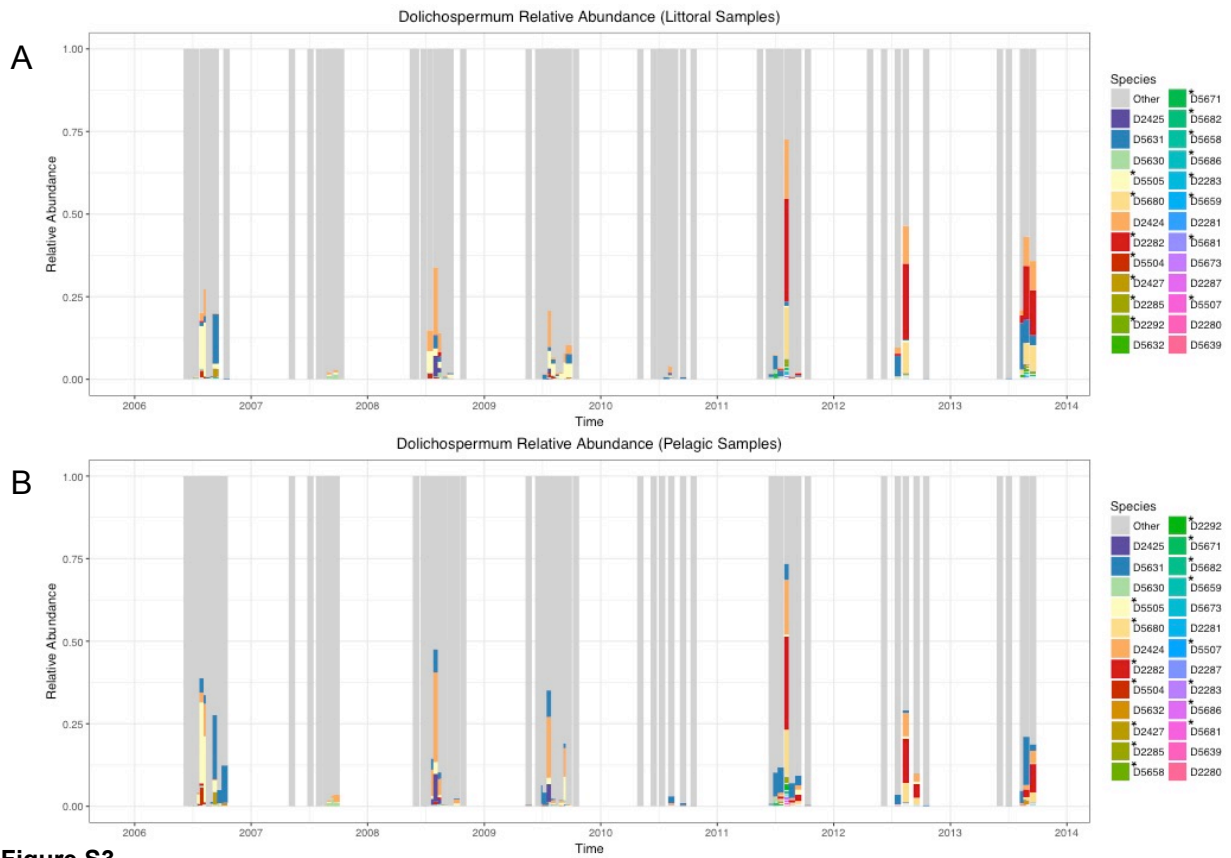

**Figure S3**

**Figure S3.** Relative abundance of the different *Dolichospermum* nodes (species) over time.

Conditionally rare nodes are highlighted with an asterisk (\*).



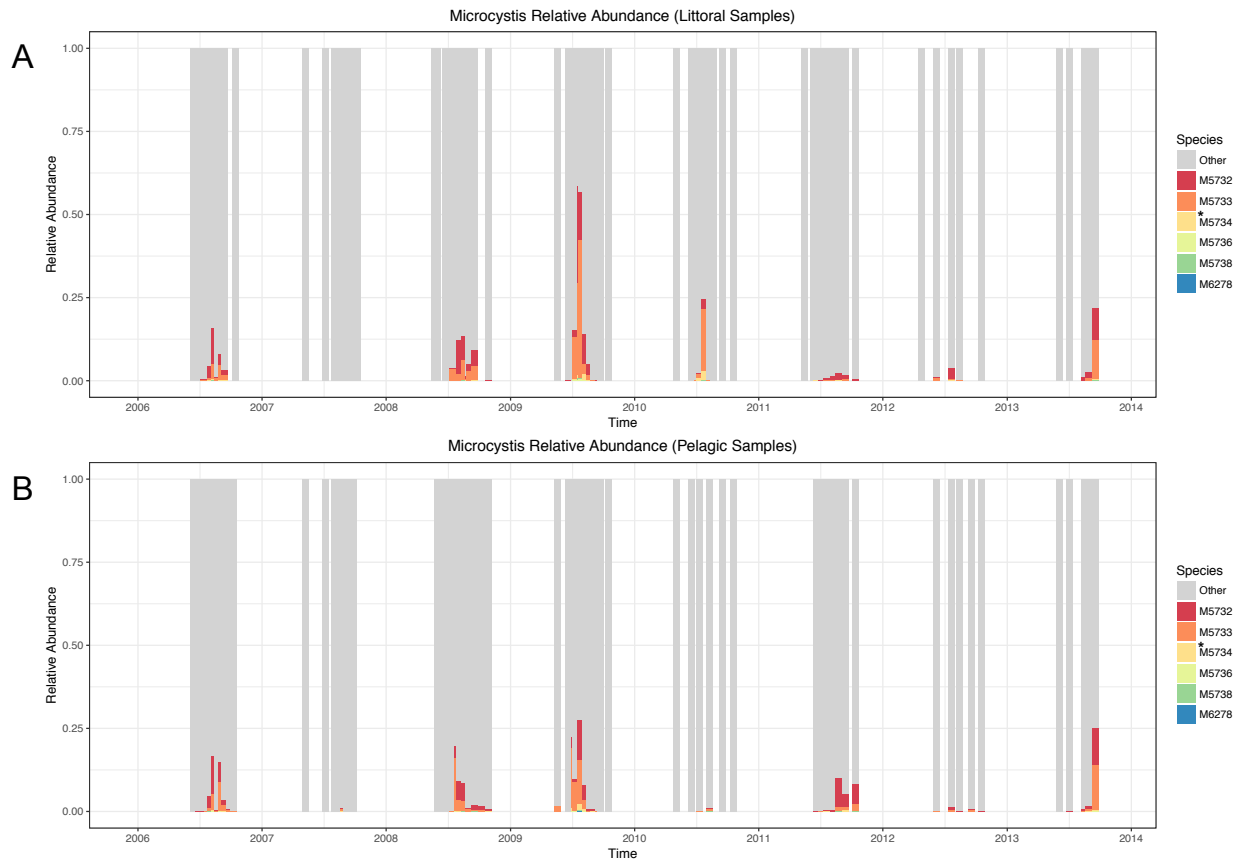

**Figure S4**

**Figure S4.** Relative abundance of the different *Microcystis* nodes (species) over time.

Conditionally rare nodes are highlighted with an asterisk (\*).

Figure S5

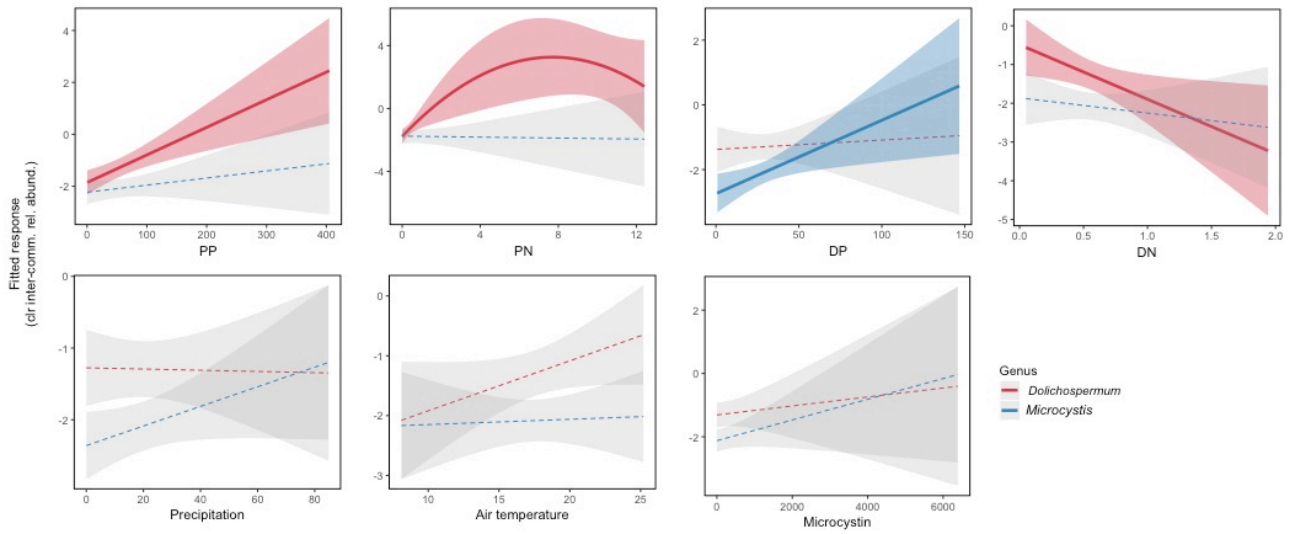

**Figure S5.** Best-fit polynomial models of the response of *Dolichospermum* (A) and *Microcystis* (B) genera to abiotic factors where the centered-log relative abundance of each genera is expressed in proportion to the total abundance of the bacterial community (clr-inter). Significant relationships are shown by solid lines and coloured confidence intervals. In most cases, the degree-1 polynomial (linear model) provided the best-fit.

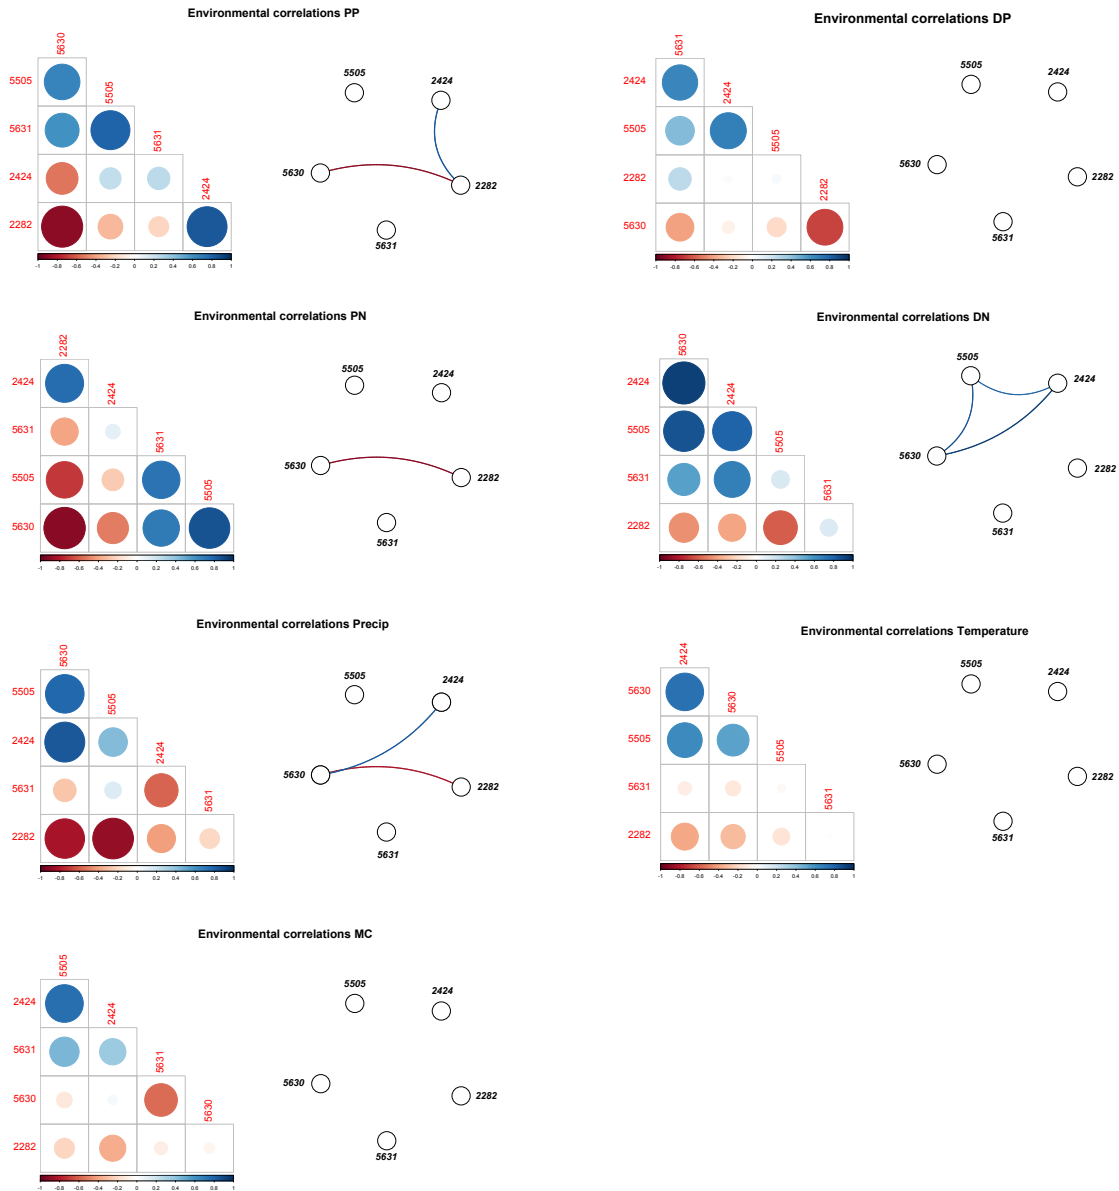

Figure S6

**Figure S6.** Summary of LVM co-response analysis of *Dolichospermum* nodes to environmental variables. The corrplot (left) shows all correlations among fitted responses, whereas the networks (right) show only the significant correlations among these. The colour of the network lines match those in the corrplot (blues = positive co-response, red = niche separation)

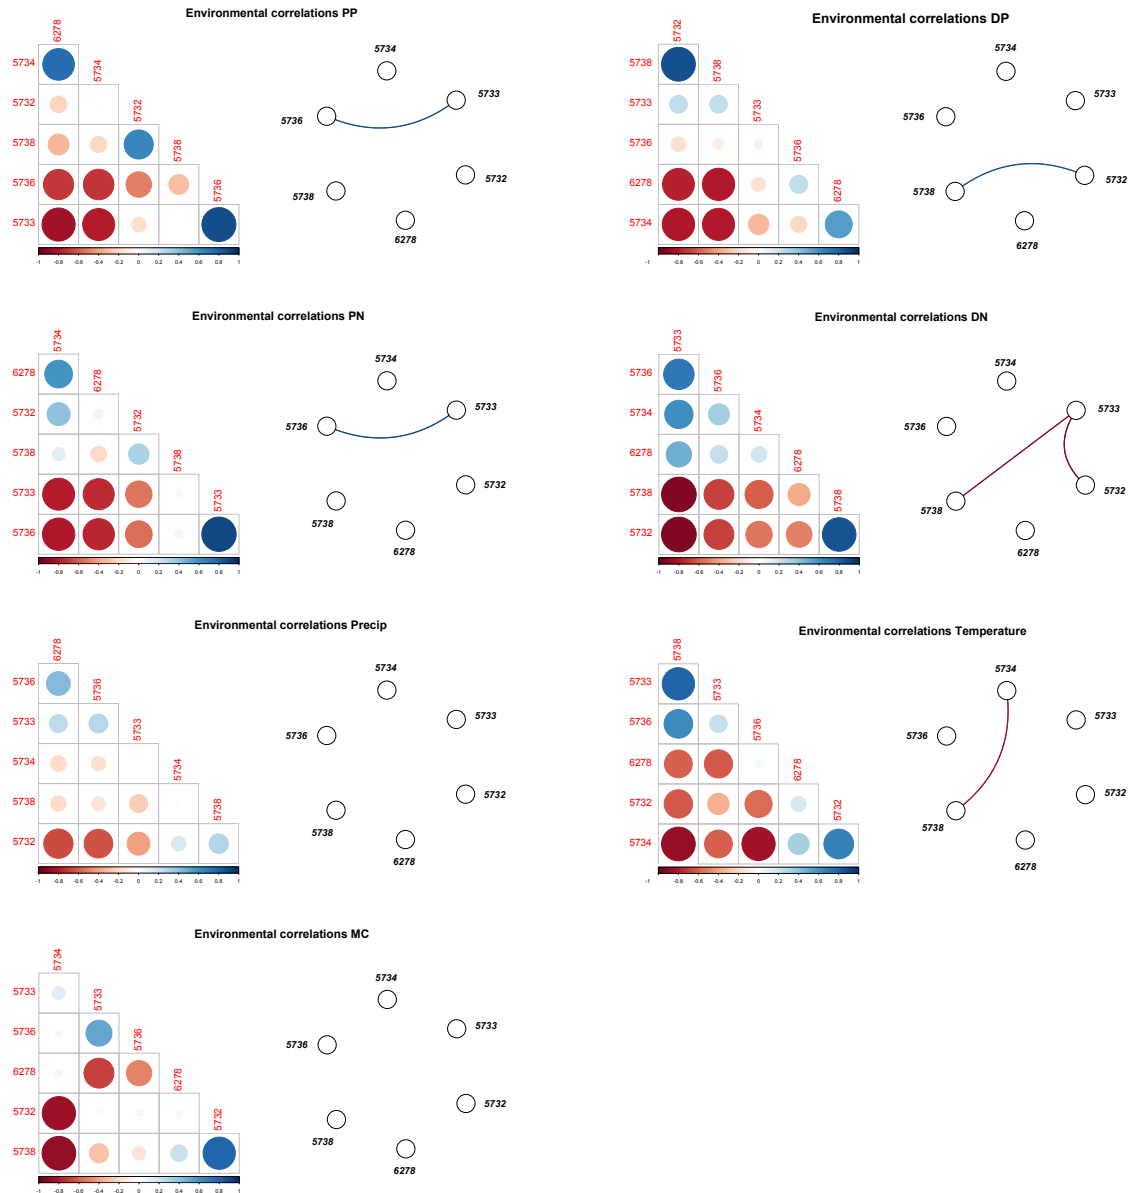

Figure S7

Figure S7. Co-responses analysis of *Microcystis* nodes to environmental variables. See Figure S6 legend for additional details.

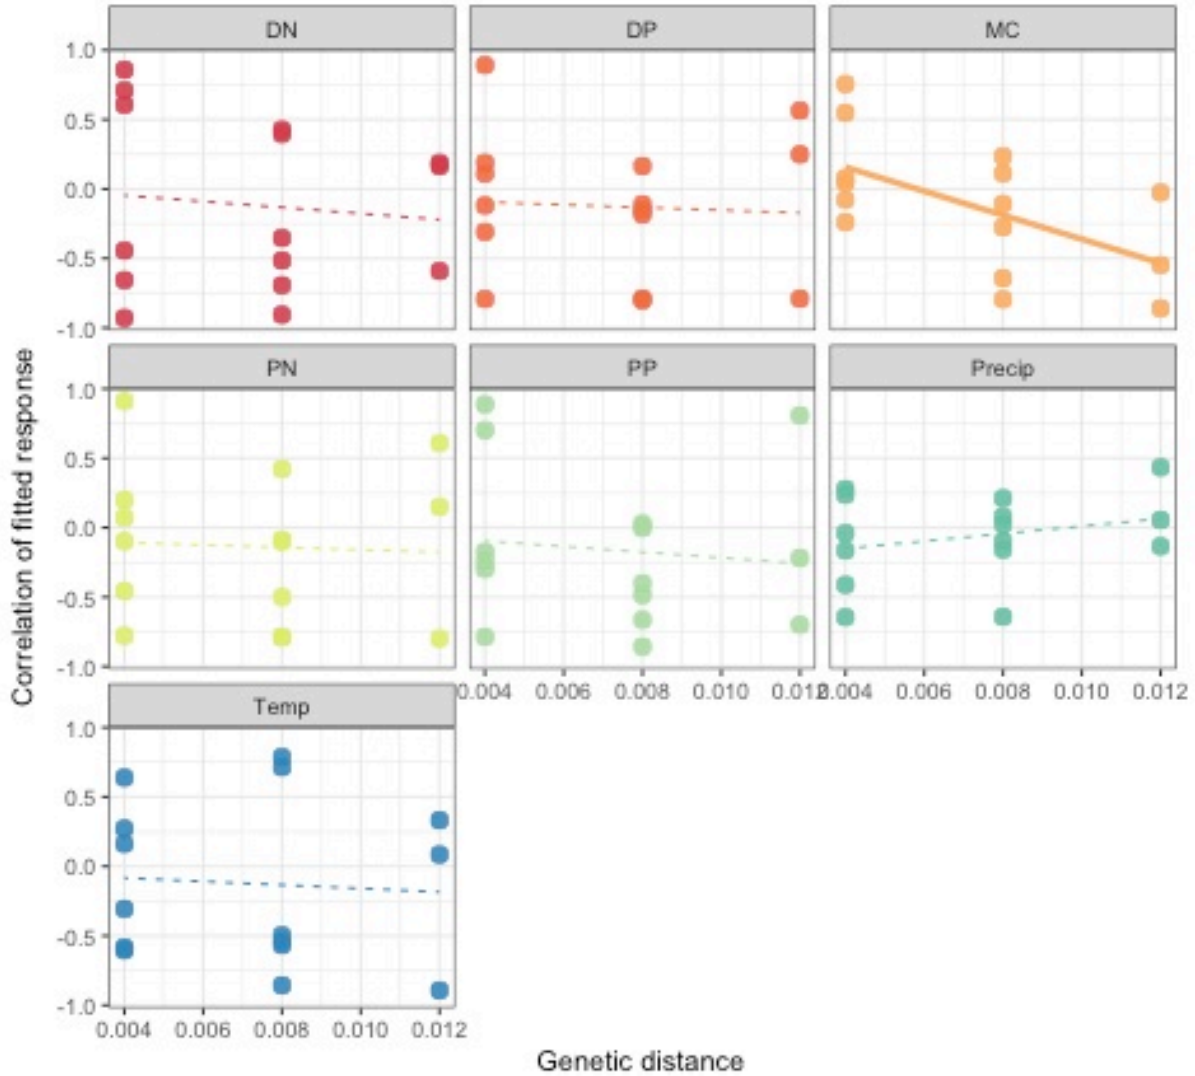

**Figure S8.** Correlations among the LVM fitted responses of *Microcystis* nodes to each abiotic factor versus their respective pairwise evolutionary distance, where the centered-log relative abundance of each *Microcystis* node is expressed in proportion to the total *Microcystis* abundance (clr-intra). Separate linear and nonlinear models were tested for each abiotic driver; see Table S4 for model results.

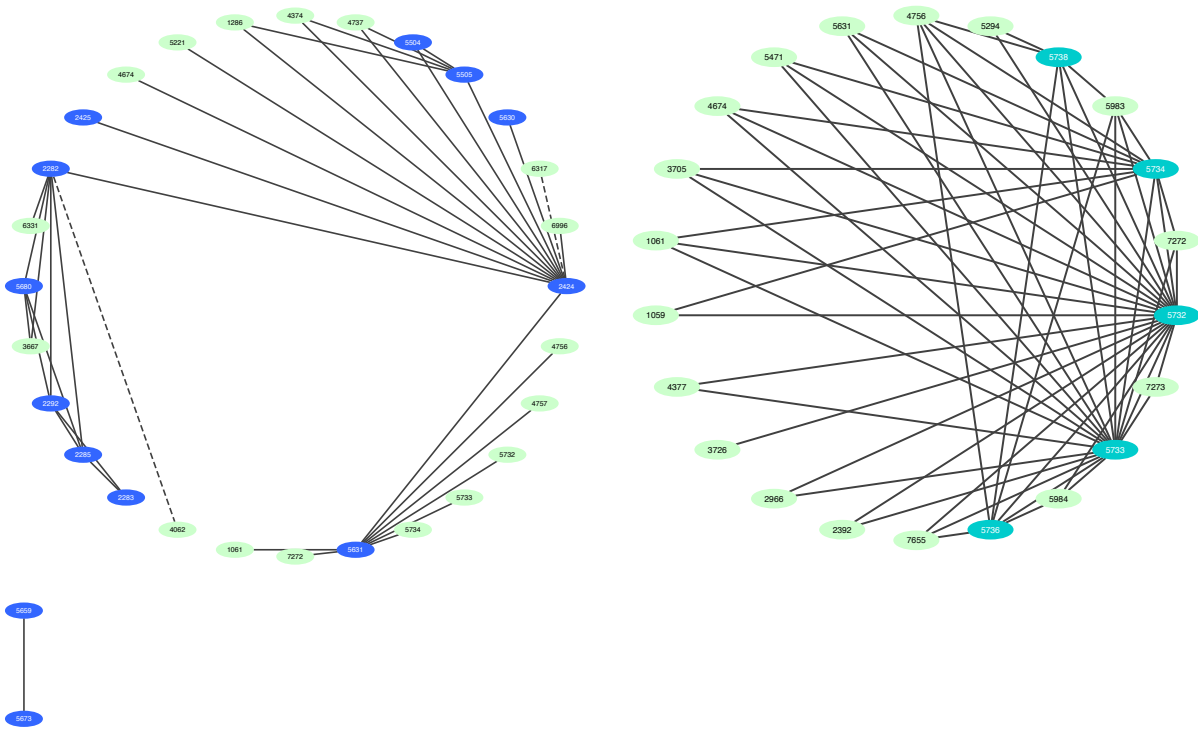

**Figure S9.** *Dolichospermum* (left) and *Microcystis* (right) SparCC co-occurrence network. Respectively 13/25 *Dolichospermum* and 5/6 *Microcystis* nodes have significant correlations with other taxa. Light green circles indicate taxa that are interacting with *Dolichospermum* or *Microcystis*, blue circles indicate *Dolichospermum* taxa (left), and turquoise circles indicate *Microcystis* taxa (right). Dashed lines show negative correlations.
